# Supplementary material for: Regionalising MUSLE factors for application to a data-scarce catchment
Source: Copernicus journal article supplement (doi:10.5194/piahs-377-19-2018), 2018-04-16

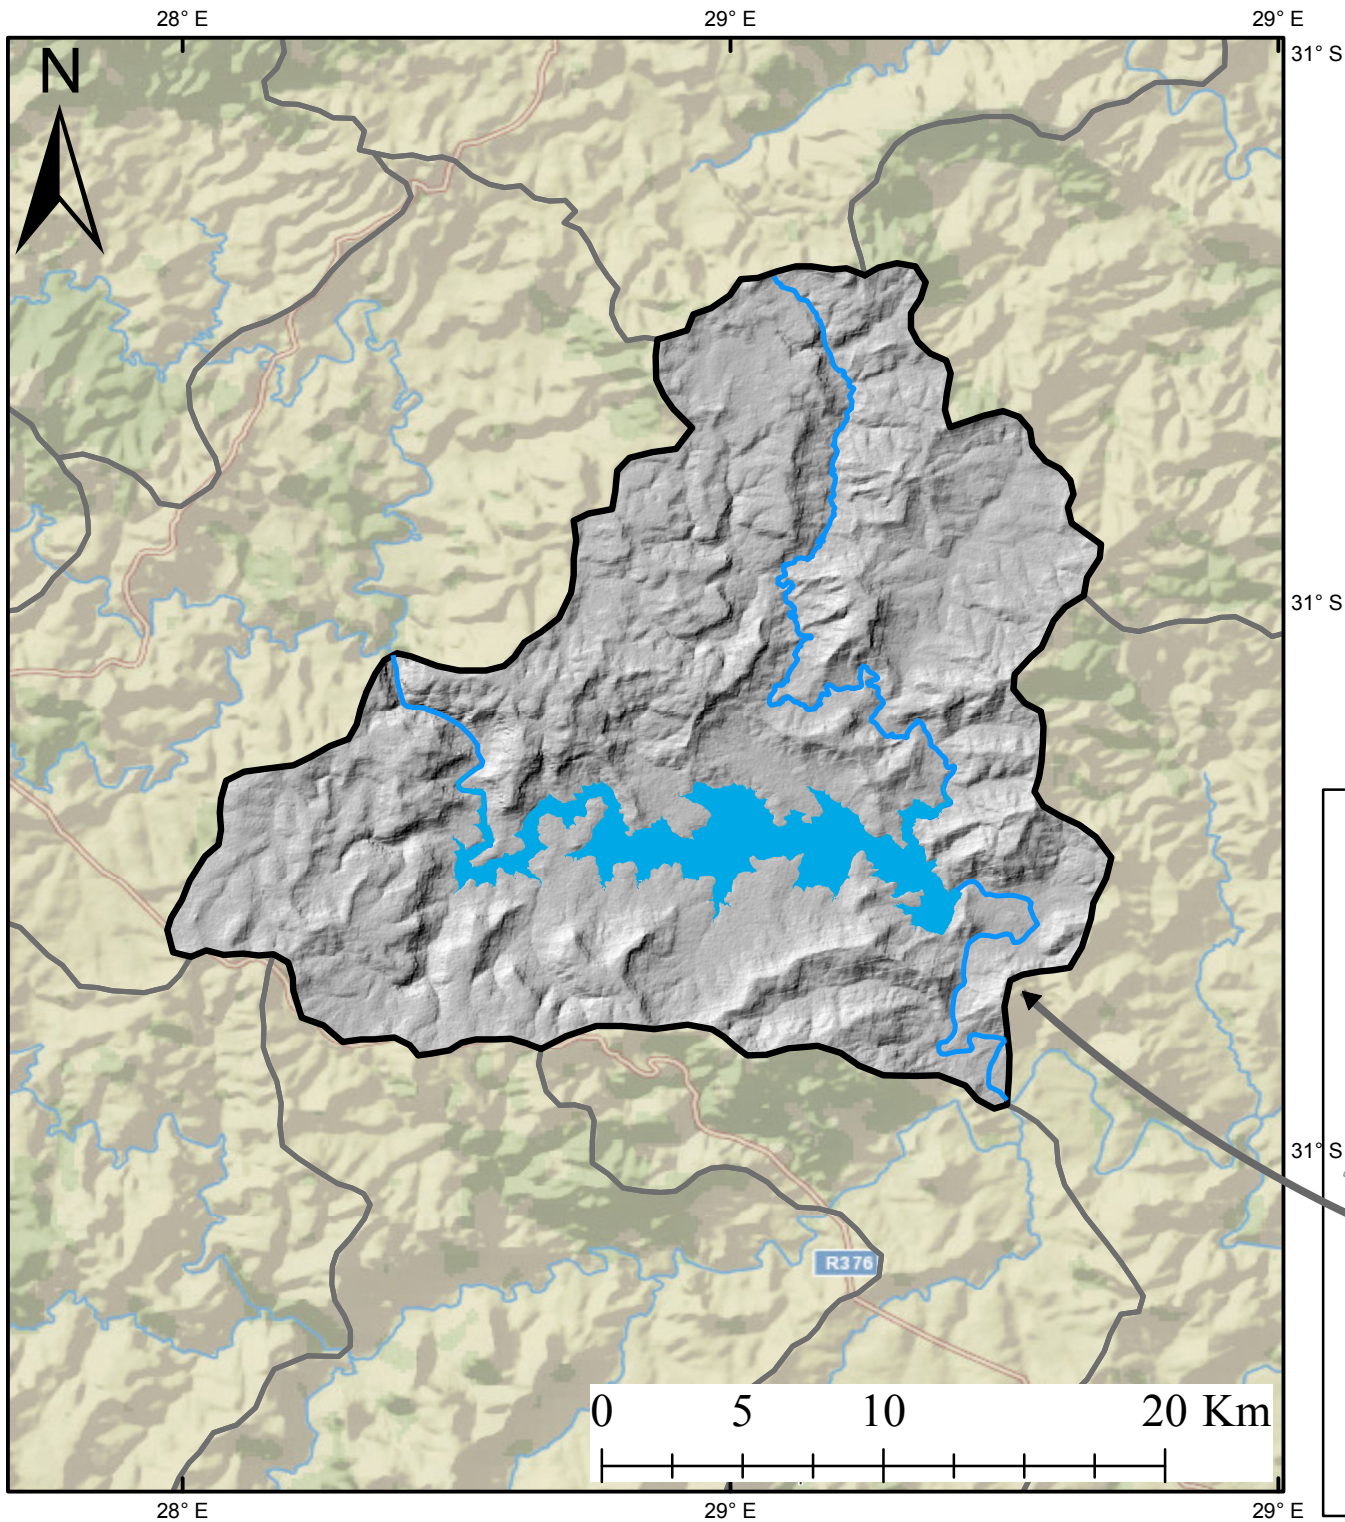

# Quaternary Catchment T35E

## Legend

-  Ntabelanga Dam (to be constructed)
-  Rivers
-  T35E\_Quaternary Catchment
-  Catchments-SA
- HillShade
  -  High
  -  Low

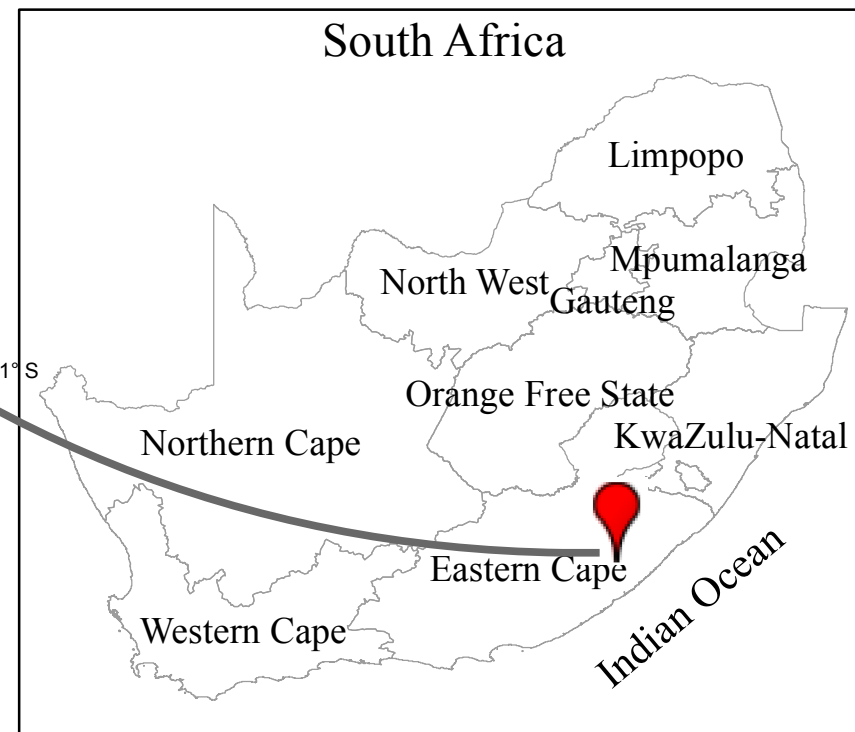

Supplement: Supplementary file 1 [file piahs-377-19-2018-supplement.zip]
