# Supplementary material for: Regionalising MUSLE factors for application to a data-scarce catchment
Source: Copernicus journal article supplement (doi:10.5194/piahs-377-19-2018), 2018-04-16
Supplement: Supplementary file 2 [file piahs-377-19-2018-supplement.zip]

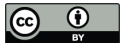

## *Supplement of*

# **Regionalising MUSLE factors for application to a data-scarce catchment**

**David Gwapedza et al.**

*Correspondence to:* Andrew Slaughter ([a.slaughter@ru.ac.za](mailto:a.slaughter@ru.ac.za))  
and David Gwapedza ([davidgwapedza@gmail.com](mailto:davidgwapedza@gmail.com))

- [piahs-377-19-2018-supplement-title-page.pdf](#)
- data
  - [PlotData.xlsx](#)
  - [Study area map\\_Fig1.pdf](#)
  - [plots.pptx](#)

The copyright of individual parts of the supplement might differ from the CC BY 4.0 License.
